CORRECTION

# Correction: Increased N-Glycosylation Efficiency by Generation of an Aromatic Sequon on N135 of Antithrombin

The PLOS ONE Staff

The images for Figs. 3 and 4 are incorrectly switched. The image that appears as Fig. 3 should be Fig. 4, and the image that appears as Fig. 4 should be Fig. 3. The figure legends appear in the correct order.

There are errors in the Van't Hoff equation under the Materials and Methods subsection titled "Determination of denaturing temperature." Please view the complete, correct equation here:

$$dG = -RT \ln(F_{obs} - F_{n_0}) / (F_{d_0} - F_{obs}) = dH_m(1 - T/T_m)$$

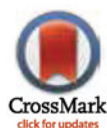

**OPEN ACCESS**

**Citation:** The PLOS ONE Staff (2015) Correction: Increased N-Glycosylation Efficiency by Generation of an Aromatic Sequon on N135 of Antithrombin. PLoS ONE 10(3): e0122177. doi:10.1371/journal.pone.0122177

**Published:** March 23, 2015

**Copyright:** © 2015 The PLOS ONE Staff. This is an open access article distributed under the terms of the [Creative Commons Attribution License](https://creativecommons.org/licenses/by/4.0/), which permits unrestricted use, distribution, and reproduction in any medium, provided the original author and source are credited.

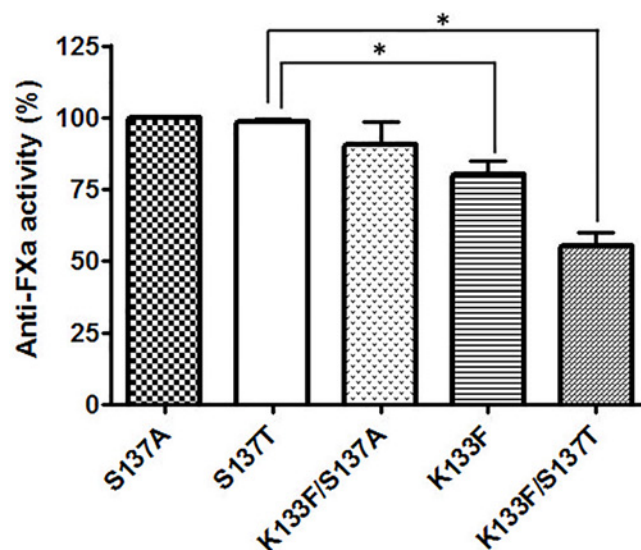

**Fig 3. Function of antithrombin variants.** Anti-FXa activity of antithrombin proteins secreted to the conditioned medium in presence of heparin. Results are expressed as a percentage of the activity of the S137T variant. Each bar represents the mean  $\pm$  standard deviation (SD) of two independent experiments performed in duplicate. The differences between mutants were tested by paired *t*-test (*p*-value). The “\*” indicated differences statistically significant with *p* < 0.05.

doi:10.1371/journal.pone.0122177.g001

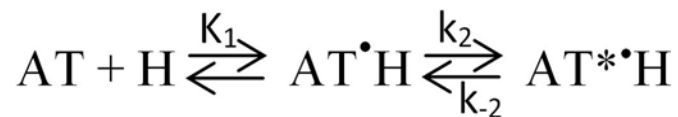

**Fig 4. Scheme of binding of antithrombin and heparin.** Initial rapid equilibrium,  $K_1$ , between antithrombin, **AT**, and pentasaccharide, **H**, leads to complex, **AT.H**, followed by rapid conformational change via  $k_2$  to a high heparin affinity, highly fluorescence complex, **AT\*.H**.

doi:10.1371/journal.pone.0122177.g002

## Reference

1. Águila S, Martínez-Martínez I, Dichiara G, Gutiérrez-Gallego R, Navarro-Fernández J, Vicente V, et al. (2014) Increased N-Glycosylation Efficiency by Generation of an Aromatic Sequon on N135 of Anti-thrombin. PLoS ONE 9(12): e114454. doi: [10.1371/journal.pone.0114454](https://doi.org/10.1371/journal.pone.0114454) PMID: [25485983](https://pubmed.ncbi.nlm.nih.gov/25485983/)
